# Supplementary material
Source: PubMed Central journal article supplement (PMC8412130)
Supplement: NIHMS1715033-supplement-1.pdf [file NIHMS1715033-supplement-1.pdf]

Supplementary Material

Table 1

*Bivariate Correlations between Primary Study Variables and with Control Variables*

|     | 1. Conflict Properties | 2. Self-blame | 3. Threat | 4. Mother-adolescent relationship quality | 5. Father-adolescent relationship quality | 6. Dispositional mindfulness | 7. Sex <sup>a</sup> | 8. Age   | 9. White <sup>b</sup> | 10. Maternal education | 11. Living status <sup>c</sup> |
|-----|------------------------|---------------|-----------|-------------------------------------------|-------------------------------------------|------------------------------|---------------------|----------|-----------------------|------------------------|--------------------------------|
| 2.  | 0.33***                | -----         |           |                                           |                                           |                              |                     |          |                       |                        |                                |
| 3.  | 0.44 ***               | 0.41 ***      | -----     |                                           |                                           |                              |                     |          |                       |                        |                                |
| 4.  | -0.44***               | -0.41 ***     | -0.38 *** | -----                                     |                                           |                              |                     |          |                       |                        |                                |
| 5.  | -0.34 ***              | -0.26**       | -0.28***  | 0.37***                                   | -----                                     |                              |                     |          |                       |                        |                                |
| 6.  | -0.00                  | -0.16         | -0.24**   | 0.14                                      | 0.16*                                     | -----                        |                     |          |                       |                        |                                |
| 7.  | 0.06                   | -0.02         | 0.10      | -0.06                                     | -0.03                                     | -0.08                        | -----               |          |                       |                        |                                |
| 8.  | 0.07                   | -0.03         | 0.00      | -0.05                                     | -0.03                                     | 0.02                         | -0.05               | -----    |                       |                        |                                |
| 9.  | -0.10                  | -0.11         | -0.14     | 0.05                                      | -0.04                                     | 0.11                         | -0.11               | -0.03    | -----                 |                        |                                |
| 10. | -0.18*                 | -0.03         | -0.07     | 0.11                                      | 0.04                                      | 0.08                         | 0.04                | -0.29*** | 0.15                  | -----                  |                                |
| 11. | -0.06                  | -0.05         | -0.01     | 0.03                                      | -0.04                                     | 0.03                         | -0.04               | -0.86*** | 0.08                  | .37***                 | -----                          |

$p < .05$ , \*\*  $p < .01$ , \*\*\*  $p < .001$  <sup>a</sup>0=Male, 1= Female. <sup>b</sup>0=Non-White, 1= White. <sup>c</sup>0=does not live at home; 1= does live at home

Table 2

*Regression Analyses Predicting Dispositional Mindfulness from Conflict Appraisals and Parent-Adolescent Relationships*

| Variable                                            | <i>B</i> | <i>SE</i> | $\beta$ | <i>t</i> | <i>p</i> |
|-----------------------------------------------------|----------|-----------|---------|----------|----------|
| Conflict Properties <sup>a</sup>                    | 1.15     | 0.55      | 0.21    | 2.09     | 0.04     |
| Self-blame <sup>a</sup>                             | -0.35    | 0.56      | -0.06   | -0.63    | 0.53     |
| Threat <sup>a</sup>                                 | -1.66    | 0.68      | -0.24   | -2.45    | 0.02*    |
| Mother-adolescent relationship quality <sup>a</sup> | 0.30     | 0.50      | 0.06    | 0.59     | 0.56     |
| Father-adolescent relationship quality <sup>a</sup> | 0.90     | 0.60      | 0.13    | 1.50     | 0.14     |
| Sex <sup>b</sup>                                    | -0.08    | 0.09      | -10.41  | -0.88    | 0.38     |
| Age                                                 | 0.02     | 0.03      | 2.62    | 0.79     | 0.43     |
| White <sup>c</sup>                                  | 0.12     | 0.12      | 0.08    | 1.00     | 0.32     |
| Maternal Education                                  | -0.01    | 0.01      | -0.07   | -0.80    | 0.43     |
| Living Status <sup>d</sup>                          | 0.06     | 0.08      | 7.88    | 0.76     | 0.45     |

*Note.* \* Significant controlling for the false discovery rate; <sup>a</sup>Log-transformed. <sup>b</sup>0=Male, 1= Female. <sup>c</sup>0=Non-White, 1= White. <sup>d</sup>0=does not live at home; 1= does live at home
